# Supplementary material for: Analysis of MMP-2-735C/T (rs2285053) and MMP-9-1562C/T (rs3918242) Polymorphisms in the Risk Assessment of Developing Lung Cancer
Source: MDPI journal article supplement (doi:10.3390/ijms241310576), 2023-06-24
Supplement: s1 [file s1]

Supplementary materials

**Table S1.** Observed and expected MMP-2 -735C/T and MMP-9 -1562C/T genotype frequencies in controls and cases in accordance with Hardy-Weinberg equilibrium.

|                                   | Observed quantity |    |    | Expected quantity |    |    | <i>p</i> value<br>(Pearson's chi-square test) |
|-----------------------------------|-------------------|----|----|-------------------|----|----|-----------------------------------------------|
|                                   | CC                | CT | TT | CC                | CT | TT |                                               |
| <i>MMP-2 -735C/T (rs2285053)</i>  |                   |    |    |                   |    |    |                                               |
| Control – overall                 | 77                | 18 | 5  | 74                | 24 | 2  | 0.041271                                      |
| Control – non-smokers             | 39                | 5  | 3  | 35                | 11 | 1  | 0.012686                                      |
| Control – smokers                 | 37                | 12 | 2  | 38                | 12 | 1  | 0.600091                                      |
| Cases – overall                   | 83                | 26 | 1  | 81                | 26 | 2  | 0.718193                                      |
| Cases – adenocarcinoma            | 39                | 10 | 0  | 36                | 12 | 1  | 0.485565                                      |
| Cases – squamous cell carcinoma   | 28                | 7  | 0  | 26                | 8  | 1  | 0.576778                                      |
| Cases – other lung neoplasms      | 16                | 9  | 1  | 19                | 6  | 1  | 0.330751                                      |
| <i>MMP-9 -1562C/T (rs3918242)</i> |                   |    |    |                   |    |    |                                               |
| Control – overall                 | 70                | 25 | 4  | 69                | 28 | 3  | 0.664254                                      |
| Control – non-smokers             | 35                | 10 | 2  | 33                | 13 | 1  | 0.533840                                      |
| Control – smokers                 | 34                | 14 | 2  | 35                | 14 | 1  | 0.867274                                      |
| Cases – overall                   | 76                | 30 | 3  | 76                | 30 | 3  | 0.997984                                      |
| Cases – adenocarcinoma            | 39                | 9  | 1  | 34                | 14 | 1  | 0.303539                                      |
| Cases – squamous cell carcinoma   | 22                | 12 | 0  | 24                | 9  | 1  | 0.417721                                      |
| Cases – other lung neoplasms      | 15                | 9  | 2  | 18                | 7  | 1  | 0.200349                                      |
